# Supplementary material for: Green and facile approach for enhancing the inherent magnetic properties of carbon nanotubes for water treatment applications
Source: PLOS journal article supplement (doi:10.1371/journal.pone.0180636), 2017-07-14
Supplement: S3 (10.1371/journal.pone.0180636.s003) [file journal.pone.0180636.s003]

**Supporting Information for**

**Green and Facile Approach for Enhancing the Inherent Magnetic Properties of Carbon Nanotubes for Water Treatment Application**

**Mohamed Ateia**<sup>1\*</sup>, Christian Bender Koch<sup>2</sup>, Stanislav Jelavić<sup>3</sup>, Ann M. Hirt<sup>4</sup>, Jonathan Quinson<sup>3</sup>, Chihiro Yoshimura<sup>1</sup>, and Matthew S. Johnson<sup>2\*</sup>

<sup>1</sup> Department of Civil and Environmental Engineering, Tokyo Institute of Technology, 2-12-1-M1-4 Ookayama, Tokyo 152-8552, Japan

<sup>2</sup> Department of Chemistry, University of Copenhagen, Universitetsparken 5, DK-2100 Copenhagen Ø, Denmark.

<sup>3</sup> Nano-Science Center, Department of Chemistry, University of Copenhagen, Universitetsparken 5, DK-2100 Copenhagen Ø, Denmark

<sup>4</sup> Institute of Geophysics, ETH Zürich, Sonneggstrasse 5, CH-8092, Zürich, Switzerland.

\* Corresponding authors:

mohamedateia1@gmail.com [M. Ateia]

Submitted to: *PLOS ONE*

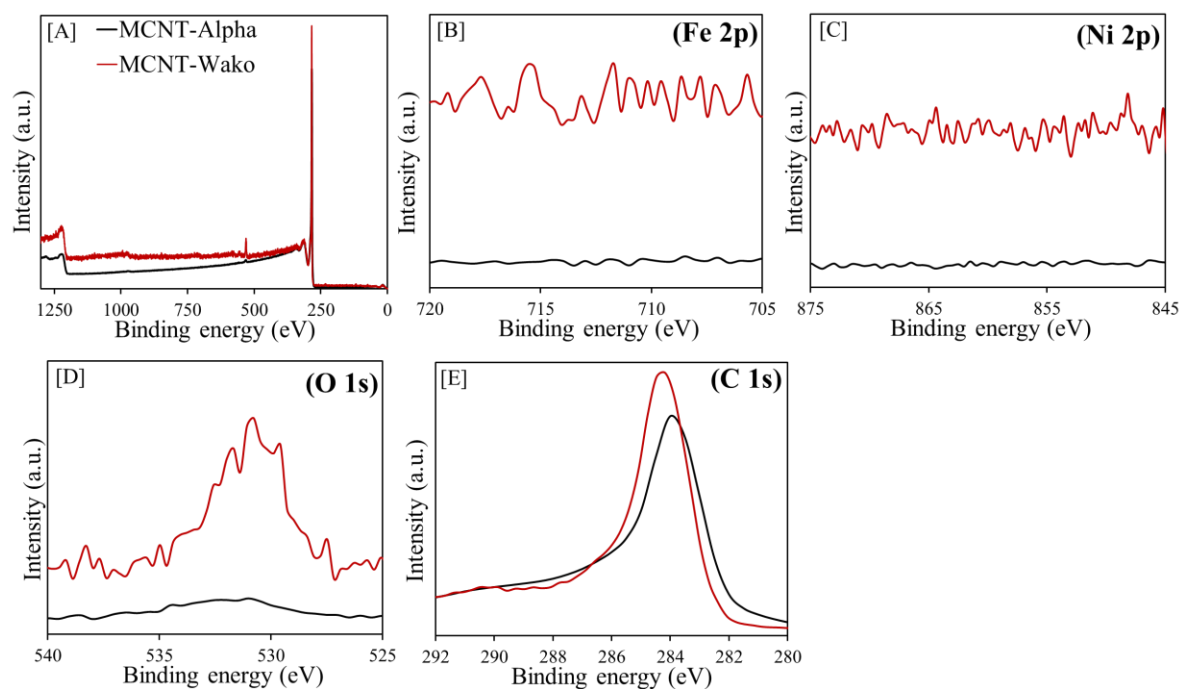

**Fig. S2.** [A] XPS scan for MCNT-Wako and MCNT-Alpha. Selected regions of high resolution scans for: [B] Fe 2p, [C] Ni 2p, [D] O 1s, and [E] C 1s spectra of MCNT-Wako and MCNT-Alpha. Only O 1s and C 1s peaks could be identified whereas, the Fe 2p and Ni 2p regions revealed only noise.
